# Supplementary material
Source: Springer Nature journal article supplement (https://www.springermedizin.de/resource/supplementary/12885_2011_2719_MOESM6_ESM.pdf/9461820)

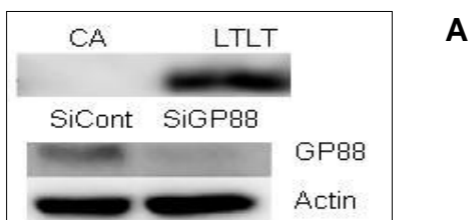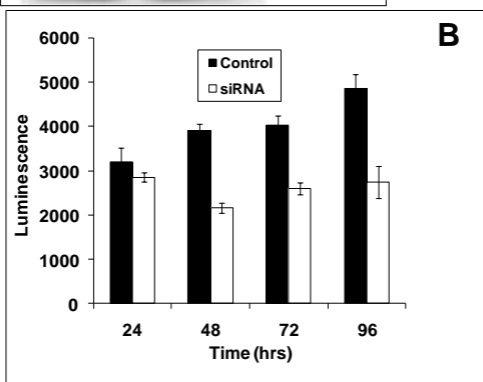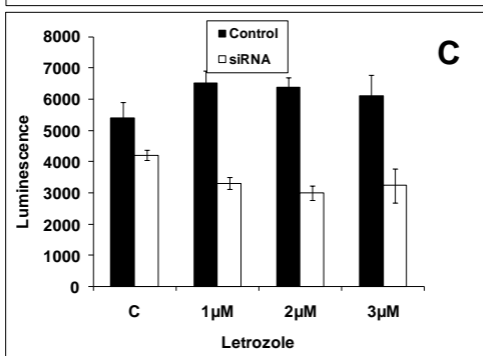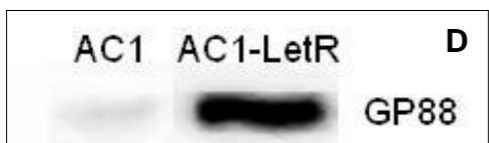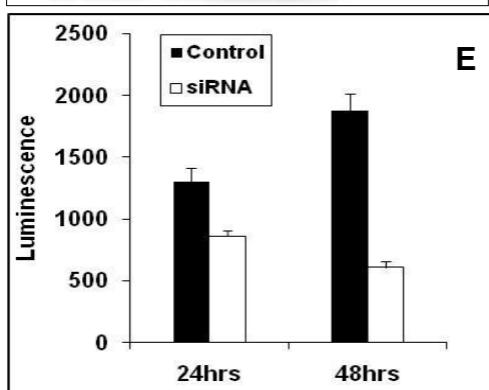

Supplement: MOESM6 [file 9461820]
